# Supplementary material
Source: publisher site journal article supplement (https://www.dovepress.com/article/418598)
Supplement: Supplementary file 1 [file get_supplementary_file.php]

Supplementary Figure 1. Scatterplot of the correlation between the key genes and immune cells in HF.


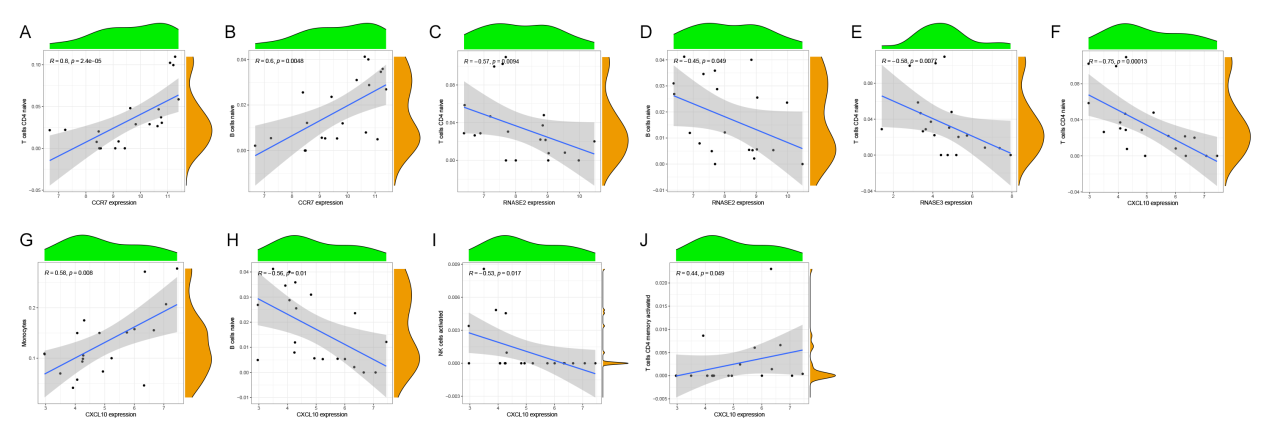


Supplementary Figure 2. Scatterplot of the correlation between the key genes and immune cells in SLE.


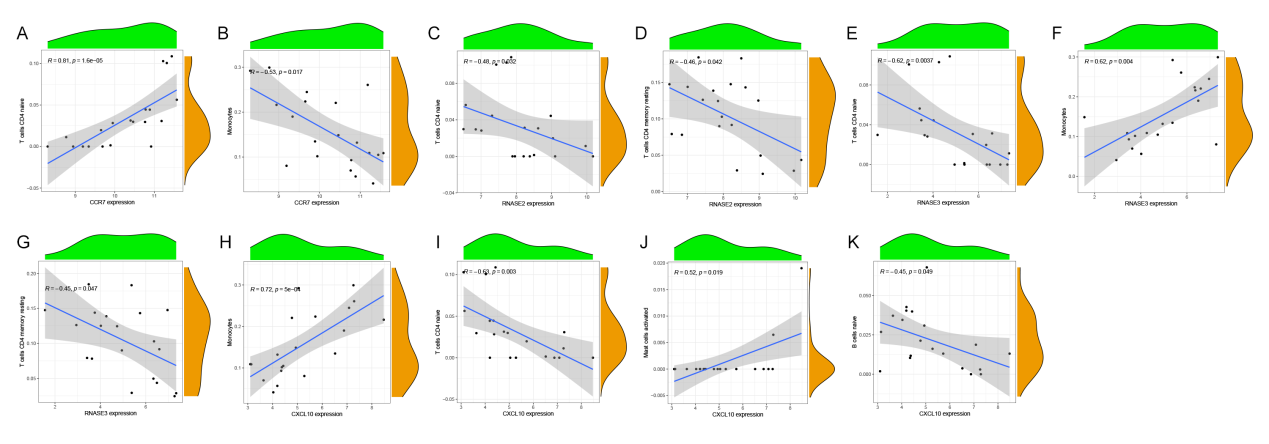


Supplementary Table 1. Sequencing data volume.

| Sample | Raw Data | | Valid Data | | Valid Ratio (reads) | Q20% | Q30% | GC content% |
| --- | --- | --- | --- | --- | --- | --- | --- | --- |
|  | Read | Base | Read | Base |  |  |  |  |
| HF_1 | 40287812 | 6.04G | 38982928 | 5.85G | 96.76 | 99.97 | 96.97 | 49.50 |
| HF_2 | 41110814 | 6.17G | 40125246 | 6.02G | 97.60 | 99.96 | 96.82 | 51 |
| HF_3 | 35163672 | 5.27G | 34261778 | 5.14G | 97.44 | 99.97 | 96.99 | 50.50 |
| HF_4 | 38164376 | 5.72G | 37110390 | 5.57G | 97.24 | 99.97 | 97.02 | 50 |
| HF_5 | 41864734 | 6.28G | 40602594 | 6.09G | 96.99 | 99.97 | 97.04 | 50 |
| HF_6 | 40334856 | 6.05G | 39099958 | 5.86G | 96.94 | 99.97 | 97.14 | 50.50 |
| HF_7 | 40799234 | 6.12G | 39556638 | 5.93G | 96.95 | 99.97 | 96.88 | 50 |
| HF_8 | 41692138 | 6.25G | 36534400 | 5.48G | 87.63 | 99.98 | 97.42 | 44.50 |
| HF_9 | 39003230 | 5.85G | 37821628 | 5.67G | 96.97 | 99.97 | 96.91 | 50.50 |
| HF_10 | 38551070 | 5.78G | 37436856 | 5.62G | 97.11 | 99.97 | 96.88 | 49.50 |
| NC_1 | 50720808 | 7.61G | 49443158 | 7.42G | 97.48 | 99.97 | 97.02 | 52.50 |
| NC_2 | 48725094 | 7.31G | 47537180 | 7.13G | 97.56 | 99.97 | 97.07 | 51.50 |
| NC_3 | 39978894 | 6.00G | 38832800 | 5.82G | 97.13 | 99.98 | 97.52 | 49.50 |
| NC_4 | 39289020 | 5.89G | 38162436 | 5.72G | 97.13 | 99.98 | 97.52 | 49.50 |
| NC_5 | 41087280 | 6.16G | 39892104 | 5.98G | 97.09 | 99.98 | 97.42 | 49.50 |
| NC_6 | 41489370 | 6.22G | 40224086 | 6.03G | 96.95 | 99.98 | 97.42 | 50.50 |
| NC_7 | 40561110 | 6.08G | 39322142 | 5.90G | 96.95 | 99.98 | 97.59 | 50 |
| NC_8 | 41205794 | 6.18G | 40023634 | 6.00G | 97.13 | 99.97 | 96.74 | 49.50 |
| NC_9 | 40901390 | 6.14G | 39638786 | 5.95G | 96.91 | 99.97 | 96.85 | 49.50 |
| NC_10 | 41574964 | 6.24G | 40261290 | 6.04G | 96.84 | 99.97 | 96.61 | 50 |
| SLE_1 | 50210186 | 7.53G | 48969944 | 7.35G | 97.53 | 99.97 | 97.19 | 52 |
| SLE_2 | 50447970 | 7.57G | 49101126 | 7.37G | 97.33 | 99.97 | 97.04 | 50.50 |
| SLE_3 | 50678022 | 7.60G | 49313788 | 7.40G | 97.31 | 99.97 | 97.33 | 50.50 |
| SLE_4 | 49262210 | 7.39G | 47974696 | 7.20G | 97.39 | 99.97 | 97.22 | 51.50 |
| SLE_5 | 39452970 | 5.92G | 38379918 | 5.76G | 97.28 | 99.98 | 97.19 | 50 |
| SLE_6 | 40854282 | 6.13G | 39644826 | 5.95G | 97.04 | 99.98 | 97.12 | 49.50 |
| SLE_7 | 40955024 | 6.14G | 39862924 | 5.98G | 97.33 | 99.98 | 97.33 | 50.50 |
| SLE_8 | 41731632 | 6.26G | 40516956 | 6.08G | 97.09 | 99.98 | 97.41 | 50.50 |
| SLE_9 | 41100466 | 6.17G | 39854510 | 5.98G | 96.97 | 99.98 | 97.16 | 49.50 |
| SLE_10 | 39946484 | 5.99G | 38763906 | 5.81G | 97.04 | 99.98 | 97.28 | 50.50 |

Supplementary Table 2. Basic patient information.

| Number | male/female | age (years) |
| --- | --- | --- |
| HF-1 | female | 81 |
| HF-2 | male | 37 |
| HF-3 | female | 77 |
| HF-4 | female | 67 |
| HF-5 | male | 61 |
| HF-6 | female | 78 |
| HF-7 | female | 66 |
| HF-8 | female | 69 |
| HF-9 | female | 63 |
| HF-10 | male | 44 |
| SLE-1 | female | 65 |
| SLE-2 | female | 60 |
| SLE-3 | female | 65 |
| SLE-4 | female | 58 |
| SLE-5 | male | 46 |
| SLE-6 | female | 47 |
| SLE-7 | female | 57 |
| SLE-8 | female | 82 |
| SLE-9 | female | 67 |
| SLE-10 | female | 78 |
| NC-1 | male | 68 |
| NC-2 | female | 53 |
| NC-3 | male | 78 |
| NC-4 | female | 44 |
| NC-5 | female | 60 |
| NC-6 | female | 68 |
| NC-7 | female | 57 |
| NC-8 | female | 65 |
| NC-9 | female | 72 |
| NC-10 | female | 60 |
